# Supplementary material for: Fe and Cu dual-doped Ni3S4 nanoarrays with less low-valence Ni species for boosting water oxidation reaction
Source: Royal Society of Chemistry journal article supplement (doi:10.1039/d1dt03902d), 2021-12-17
Supplement: d1dt03902d1.pdf [file d1dt03902d1.pdf]

## Fe and Cu dual-doped Ni<sub>3</sub>S<sub>4</sub> nanoarray with less low-valence Ni species for boosting water oxidation reaction

Xiaoqiang Du<sup>a\*</sup>, Jiaxin Li<sup>a</sup> and Xiaoshuang Zhang<sup>b</sup>

<sup>a</sup>School of Chemical Engineering and Technology, North University of China, Xueyuan road 3, Taiyuan 030051, People's Republic of China. E-mail: duxq16@nuc.edu.cn

<sup>b</sup>School of Science, North University of China, Xueyuan road 3, Taiyuan 030051, People's Republic of China.

### DFT calculation

The DFT calculations were performed using the Cambridge Sequential Total Energy Package (CASTEP) with the plane-wave pseudo-potential method. The geometrical structures of the (220) plane of Fe-Cu-Ni<sub>3</sub>S<sub>4</sub> were optimized by the generalized gradient approximation (GGA) methods. The Revised Perdew-Burke-Ernzerh of (RPBE) functional was used to treat the electron exchange correlation interactions. A Monkhorst Pack grid k-points of 4\*3\*1 of Fe-Cu-Ni<sub>3</sub>S<sub>4</sub>, a plane-wave basis set cut-off energy of 400 eV were used for integration of the Brillouin zone. The structures were optimized for energy and force convergence set at 0.05 eV/Å and 2.0×10<sup>-5</sup> eV, respectively. The vacuum space was up to 0.002 Å to eliminate periodic interactions.

**Table S1.** ICP data of Fe-Cu-Ni<sub>3</sub>S<sub>4</sub> nanosheets.

| element | atomic percentage(At %) |
|---------|-------------------------|
| Fe      | 4.08                    |
| Cu      | 4.61                    |
| Ni      | 36.51                   |
| S       | 45.37                   |

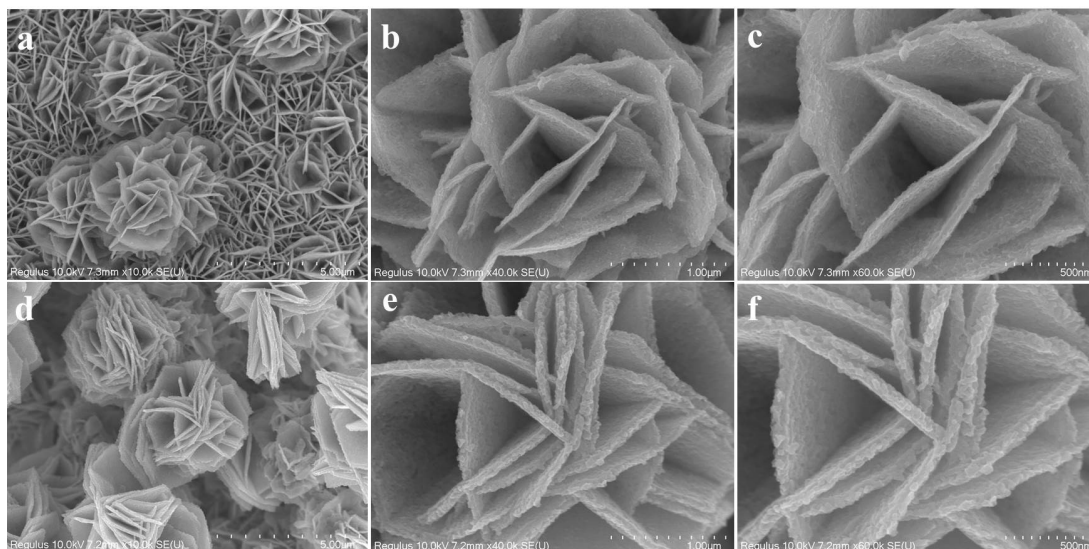

**Fig. S1.** SEM images of Fe-Ni<sub>3</sub>S<sub>4</sub> with (a) low and (b,c) high magnifications. SEM images of Cu-Ni<sub>3</sub>S<sub>4</sub> with (d) low and (e,f) high magnifications.

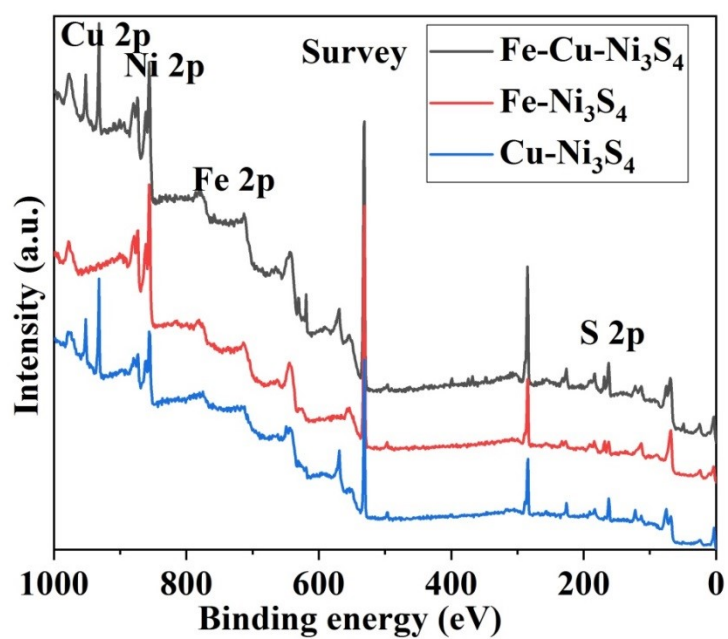

**Fig. S2.** XPS survey spectrum for Fe-Ni<sub>3</sub>S<sub>4</sub>, Cu-Ni<sub>3</sub>S<sub>4</sub> and Fe-Cu-Ni<sub>3</sub>S<sub>4</sub> nanosheets.

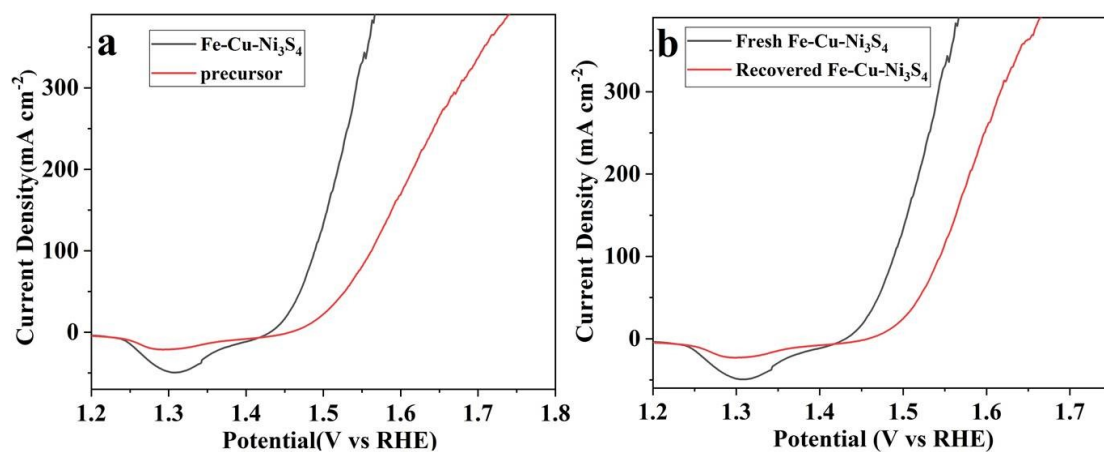

**Fig. S3.** (a) Linear sweep voltammetry polarization curves of the precursor and Fe-Cu-Ni<sub>3</sub>S<sub>4</sub>. (b) Linear sweep voltammetry polarization curves of Fe-Cu-Ni<sub>3</sub>S<sub>4</sub> before and after 10 h.

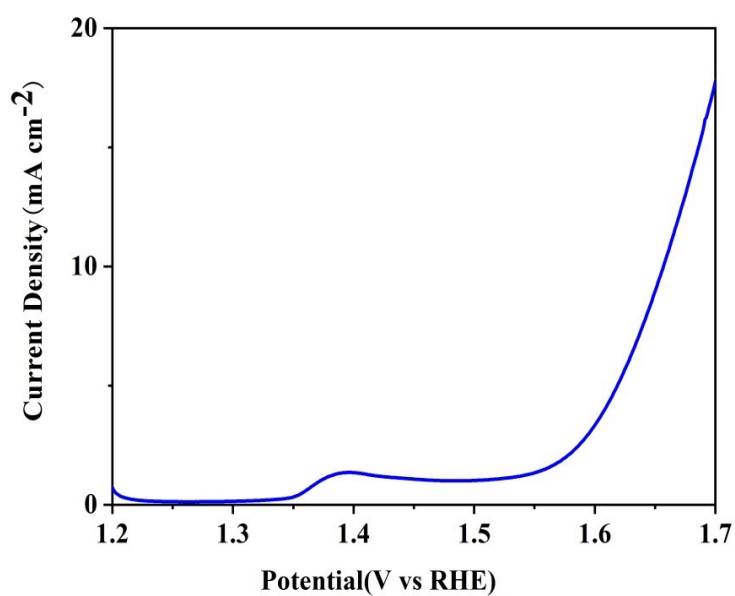

**Fig. S4** Polarization curve of the Ni foam for OER with a scan rate of 5 mV s<sup>-1</sup> in 1 M KOH.

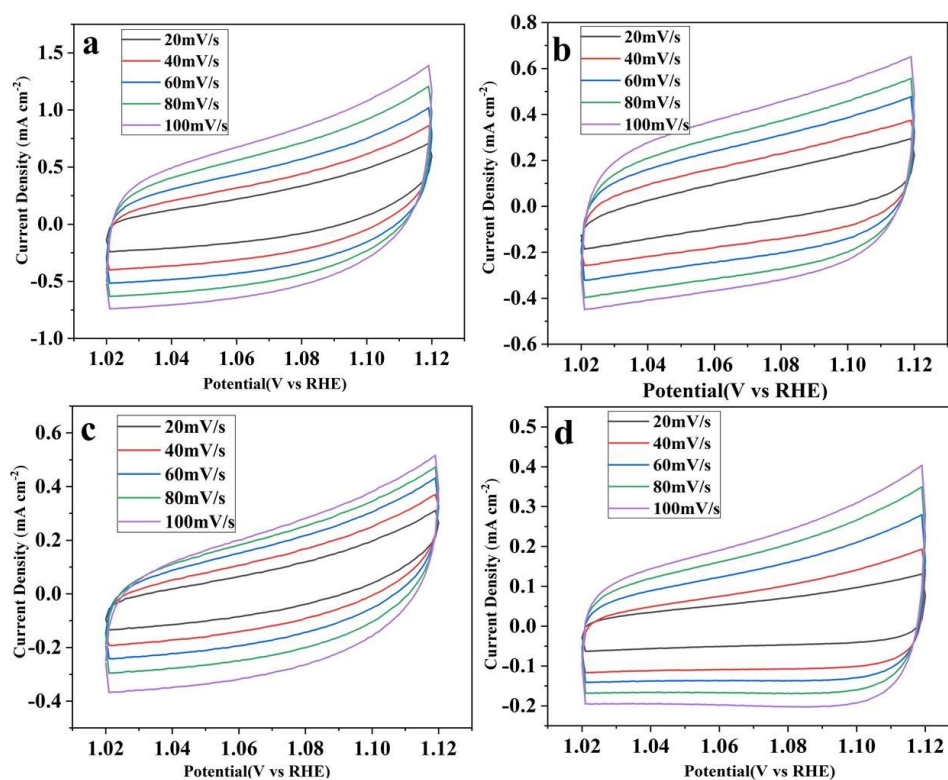

**Fig. S5** CV curves with different scan rates in OER, Fe-Cu-Ni<sub>3</sub>S<sub>4</sub>/NF (a), Fe-Ni<sub>3</sub>S<sub>4</sub>/NF (b), Cu-Ni<sub>3</sub>S<sub>4</sub>/NF (c) Ni<sub>3</sub>S<sub>4</sub>/NF (d).

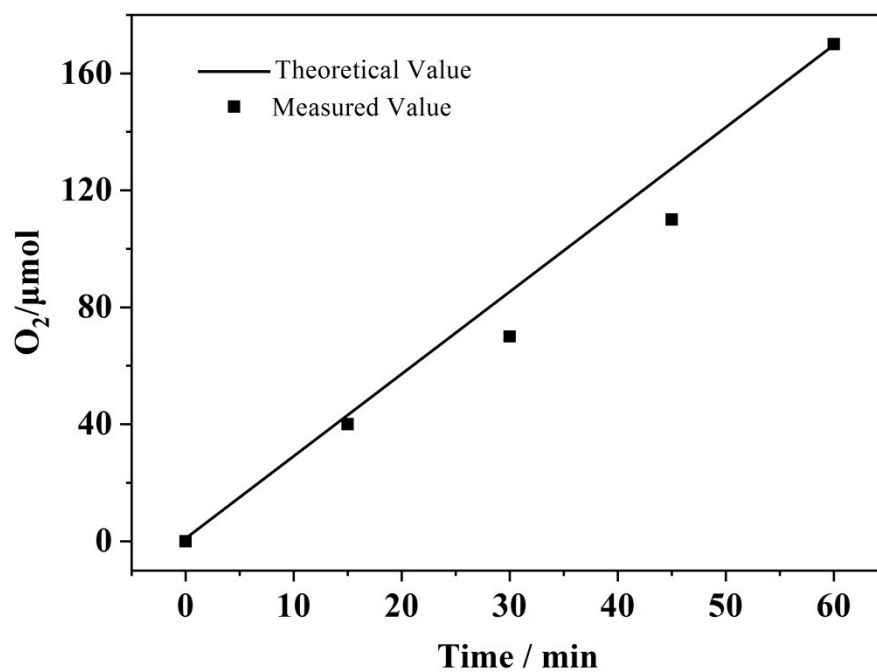

**Fig. S6** Electrocatalytic efficiency of O<sub>2</sub> production over Fe-Cu-Ni<sub>3</sub>S<sub>4</sub>/NF.

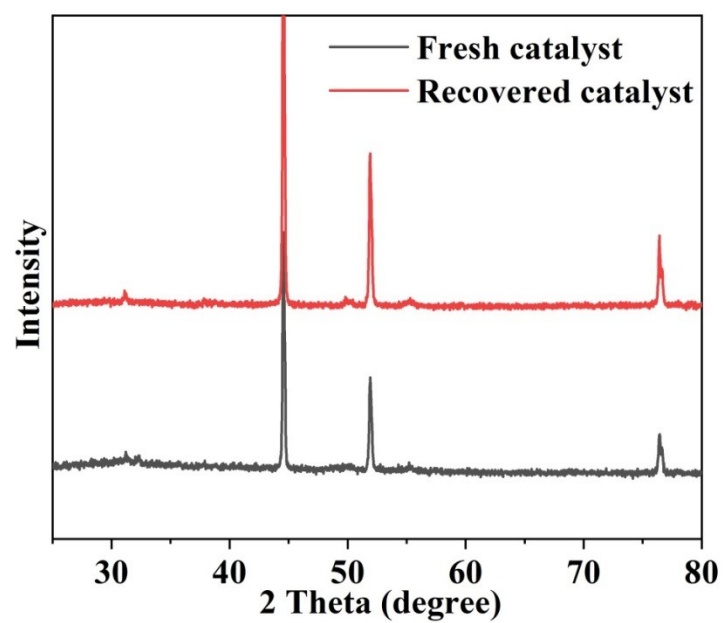

**Fig. S7** XRD of fresh and recovered Fe-Cu-Ni<sub>3</sub>S<sub>4</sub>/NF after OER.

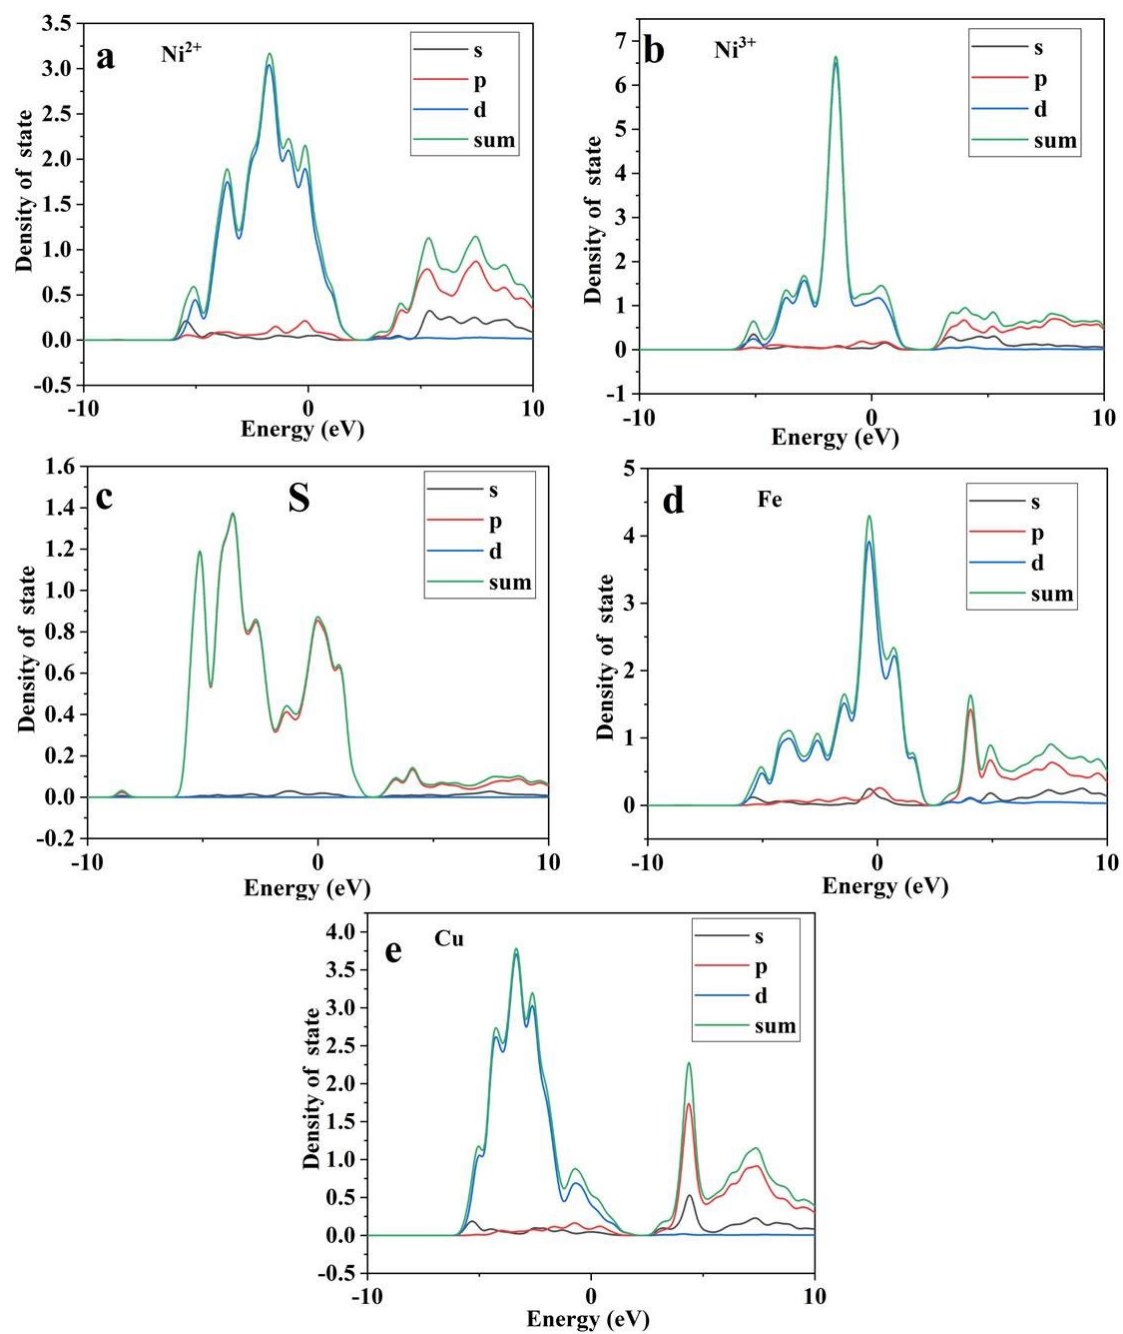

**Fig. S8** Density of states (Ni<sup>2+</sup> as adsorption sites) for Fe-Cu-Ni<sub>3</sub>S<sub>4</sub>, (a) Ni<sup>2+</sup>, (b) Ni<sup>3+</sup>, (c) S, (d) Fe and (e) Cu.

**Table S2.** Comparison of recently reported catalytic properties of element doped Nickel based sulfides.

| Electrocatalysts                                             | Overpotential                          | References                                 |
|--------------------------------------------------------------|----------------------------------------|--------------------------------------------|
| <b>Fe-Cu-Ni<sub>3</sub>S<sub>4</sub></b>                     | <b>230 mV at 50 mA cm<sup>-2</sup></b> | <b>This work</b>                           |
| FeCo-Ni <sub>3</sub> S <sub>4</sub>                          | 230 mV at 20 mA cm <sup>-2</sup>       | Chem. Eng. J. 2022, 427, 130742            |
| N doped NiS <sub>2</sub> nanoarrays                          | 270 mV at 10 mA cm <sup>-2</sup>       | J. Mater. Chem. A, 2017, 5, 17811–17816    |
| Ni <sup>3+</sup> self-doped Ni <sub>3</sub> S <sub>4</sub>   | 266 mV at 10 mA cm <sup>-2</sup>       | J. Colloid Interf. Sci. 2020, 564, 418–427 |
| Co and Ce dual doped Ni <sub>3</sub> S <sub>2</sub>          | 280 mV at 20 mA cm <sup>-2</sup>       | Nano Res. 2020, 13, 2130–2135              |
| Cu and Co co-doped Ni <sub>3</sub> S <sub>2</sub>            | 370 mV at 10 mA cm <sup>-2</sup>       | Appl. Sur. Sci. 2020, 502, 144172          |
| Fe-doped Ni <sub>3</sub> S <sub>2</sub>                      | 295 mV at 10 mA cm <sup>-2</sup>       | Nanoscale, 2019, 11, 2355                  |
| N-doped Ni-Ni <sub>3</sub> S <sub>2</sub> @carbon nanoplates | 284 mV at 10 mA cm <sup>-2</sup>       | Small 2019, 15, 1900348                    |
| Cu-doped Ni <sub>3</sub> S <sub>2</sub>                      | 259 mV at 10 mA cm <sup>-2</sup>       | J. Solid State Chem. 2021, 293, 121776     |

**Table S3.** Comparison of recently reported catalytic properties of nickel based sulfides.

| Electrocatalysts                               | Overpotential                          | References                                            |
|------------------------------------------------|----------------------------------------|-------------------------------------------------------|
| <b>Fe-Cu-Ni<sub>3</sub>S<sub>4</sub></b>       | <b>230 mV at 50 mA cm<sup>-2</sup></b> | <b>This work</b>                                      |
| Ni <sub>3</sub> S <sub>2</sub>                 | 296 mV at 10 mA cm <sup>-2</sup>       | J. Mater. Chem. A, 2019, 7, 18003–18011               |
| NiS/C <sub>3</sub> N <sub>4</sub>              | 334 mV at 10 mA cm <sup>-2</sup>       | Chem. Eng. J. 2021, 410, 128394                       |
| Ni <sub>3</sub> S <sub>2</sub> /NiS            | 298 mV at 10 mA cm <sup>-2</sup>       | ACS Appl. Mater. Interfaces 2019, 11, 26, 23180–23191 |
| Ni <sub>3</sub> S <sub>2</sub> superstructures | 340 mV at 10 mA cm <sup>-2</sup>       | J. Mater. Chem. A, 2016, 4, 13916–13922               |
| NiS/NiS <sub>2</sub>                           | 416 mV at 100 mA cm <sup>-2</sup>      | J. Mater. Chem. A, 2018, 6, 8233–8237                 |
| MoS <sub>2</sub> /NiS                          | 350 mV at 10 mA cm <sup>-2</sup>       | Small 2019, 15, 1803639                               |
| NiS <sub>2</sub> /CoS <sub>2</sub> nanowires   | 235 mV at 10 mA cm <sup>-2</sup>       | Adv. Mater. 2017, 29, 1704681                         |
| porous Ni <sub>3</sub> S <sub>4</sub>          | 257 mV at 10 mA cm <sup>-2</sup>       | Adv. Funct. Mater. 2019, 29, 1900315                  |
| Ni <sub>3</sub> S <sub>4</sub> /N,P-C          | 370 mV at 10 mA cm <sup>-2</sup>       | Chem. Eur. J. 2019, 25, 7561 – 7568                   |
| Ni <sub>3</sub> S <sub>2</sub> nanosheet       | 260 mV at 10 mA cm <sup>-2</sup>       | J. Am. Chem. Soc. 2015, 137, 14023–14026              |

**Table S4.** Comparison of OER performances for Fe-Cu-Ni<sub>3</sub>S<sub>4</sub> with other reported electrocatalysts.

| Electrocatalysts                                 | Overpotential                         | References                                        |
|--------------------------------------------------|---------------------------------------|---------------------------------------------------|
| <b>Fe-Cu-Ni<sub>3</sub>S<sub>4</sub></b>         | <b>230 mV at 50mA cm<sup>-2</sup></b> | <b>This work</b>                                  |
| CoO <sub>x</sub> /FeO <sub>x</sub> /CNT          | 308 mV at 10 mA cm <sup>-2</sup>      | J. Mater. Chem. A, 2020, 8, 15140–15147           |
| NiS <sub>2</sub> /NiSe <sub>2</sub> nanocage     | 290 mV at 20 mA cm <sup>-2</sup>      | Small 2020, 16, 1905083                           |
| Co-Fe-V metal oxides                             | 249 mV at 10 mA cm <sup>-2</sup>      | J. Mater. Chem. A, 2020, 8, 15951–15961           |
| P-doped NiCo <sub>2</sub> O <sub>4</sub>         | 300 mV at 10 mA cm <sup>-2</sup>      | ACS Appl. Mater. Interfaces 2020, 12, 2763–2772   |
| NiS/Fe <sub>3</sub> O <sub>4</sub> HNPs@CNT      | 243 mV at 10 mA cm <sup>-2</sup>      | ACS Appl. Mater. Interfaces 2020, 12, 31552–31563 |
| Fe <sub>3</sub> O <sub>4</sub> /FeS <sub>2</sub> | 253 mV at 10 mA cm <sup>-2</sup>      | J. Mater. Chem. A, 2020, 8, 14145–14151           |
| CoMoOS nanoboxes                                 | 281 mV at 10 mA cm <sup>-2</sup>      | Appl. Catal. B: Environ. 2020, 265, 118605        |
| Ni <sub>59</sub> Cu <sub>19</sub> P <sub>9</sub> | 307 mV at 10 mA cm <sup>-2</sup>      | Appl. Catal. B: Environ. 2018, 237, 409–415       |
| Fe-Ni-P-B-O                                      | 236 mV at 10 mA cm <sup>-2</sup>      | ACS Nano 2019, 13, 12969–12979                    |
| hollow Fe-Co <sub>x</sub> P                      | 300 mV at 10 mA cm <sup>-2</sup>      | Chem. Eng. J. 2021, 409, 128227                   |
